# Supplementary material for: Determinants of clinical trial failure in multiple sclerosis: insights from ClinicalTrials.gov
Source: Research Square preprint supplement (doi:10.21203/rs.3.rs-7496530/v1), 2025-09-15
Supplement: Supplementary file 1 [file 0a8f2a27d0acca5472cd41ad.docx]

**SUPPLEMENTARY MATERIAL**

**National Clinical Trial (NCT) identifier numbers of the studies included in the analysis (n = 282).**

NCT00429442, NCT00536120, NCT00605215, NCT00622700, NCT00641537, NCT00662649, NCT00666887, NCT00681538, NCT00725985, NCT00731692, NCT00744679, NCT00751881, NCT00752778, NCT00753792, NCT00755807, NCT00771043, NCT00784836, NCT00785473, NCT00813709, NCT00835770, NCT00854750, NCT00871780, NCT00881205, NCT00883337, NCT00906399, NCT00910598, NCT00930553, NCT00942214, NCT00947752, NCT00984984, NCT00988052, NCT00988988, NCT01005095, NCT01018485, NCT01034579, NCT01047319, NCT01058005, NCT01064401, NCT01067521, NCT01085318, NCT01127750, NCT01144052, NCT01149525, NCT01166178, NCT01167426, NCT01181115, NCT01194570, NCT01199861, NCT01201356, NCT01216072, NCT01225289, NCT01235221, NCT01236534, NCT01247324, NCT01252355, NCT01307332, NCT01310166, NCT01317004, NCT01328379, NCT01332019, NCT01333358, NCT01333501, NCT01337427, NCT01339676, NCT01356940, NCT01359566, NCT01395316, NCT01407211, NCT01411514, NCT01412333, NCT01416181, NCT01417273, NCT01420055, NCT01433497, NCT01436643, NCT01454791, NCT01462318, NCT01464905, NCT01480076, NCT01489254, NCT01490502, NCT01497262, NCT01498887, NCT01499667, NCT01534182, NCT01538225, NCT01556685, NCT01578330, NCT01578785, NCT01585298, NCT01591551, NCT01600716, NCT01621269, NCT01623596, NCT01633112, NCT01656148, NCT01665144, NCT01701856, NCT01705236, NCT01705457, NCT01707992, NCT01743651, NCT01755871, NCT01768039, NCT01795872, NCT01797965, NCT01817166, NCT01834586, NCT01838668, NCT01842191, NCT01844232, NCT01873417, NCT01874145, NCT01888354, NCT01892722, NCT01895335, NCT01917019, NCT01930708, NCT01939002, NCT01941004, NCT01962571, NCT01964547, NCT01968902, NCT01970410, NCT01975298, NCT01986998, NCT02047734, NCT02048072, NCT02064816, NCT02086188, NCT02090348, NCT02090413, NCT02117050, NCT02125604, NCT02142205, NCT02143167, NCT02146534, NCT02201108, NCT02205489, NCT02208050, NCT02217982, NCT02219932, NCT02220244, NCT02220933, NCT02232061, NCT02234869, NCT02241785, NCT02254304, NCT02255656, NCT02259361, NCT02283853, NCT02290444, NCT02294058, NCT02307838, NCT02315872, NCT02325440, NCT02342704, NCT02373098, NCT02410278, NCT02419378, NCT02425644, NCT02428218, NCT02428231, NCT02430532, NCT02446886, NCT02461069, NCT02471560, NCT02472938, NCT02499900, NCT02525874, NCT02545868, NCT02555215, NCT02568111, NCT02575365, NCT02576717, NCT02579681, NCT02587065, NCT02587195, NCT02634307, NCT02637856, NCT02665221, NCT02675413, NCT02683863, NCT02688985, NCT02720107, NCT02739542, NCT02746744, NCT02753088, NCT02769689, NCT02775110, NCT02792218, NCT02792231, NCT02849782, NCT02861014, NCT02869425, NCT02881567, NCT02901106, NCT02907177, NCT02936037, NCT02937285, NCT02980042, NCT03021317, NCT03046251, NCT03085810, NCT03091569, NCT03092544, NCT03093324, NCT03110315, NCT03122652, NCT03126760, NCT03135249, NCT03177083, NCT03185065, NCT03232073, NCT03257358, NCT03269175, NCT03277248, NCT03277261, NCT03283397, NCT03290131, NCT03319732, NCT03345940, NCT03364036, NCT03369665, NCT03385356, NCT03387670, NCT03424733, NCT03436199, NCT03516526, NCT03567057, NCT03585569, NCT03589105, NCT03606460, NCT03621761, NCT03623243, NCT03689972, NCT03710655, NCT03756974, NCT03784898, NCT03824938, NCT03853746, NCT03856619, NCT03870763, NCT03961204, NCT04032158, NCT04032171, NCT04048577, NCT04115488, NCT04121221, NCT04129736, NCT04175834, NCT04203498, NCT04291456, NCT04338022, NCT04338061, NCT04410965, NCT04410978, NCT04410991, NCT04411641, NCT04595045, NCT04650321, NCT04657666, NCT04667117, NCT04776213, NCT04783935, NCT04792567, NCT04819360, NCT04869358, NCT04877457, NCT04878211, NCT04966338, NCT04984278, NCT05028634, NCT05083923, NCT05177718, NCT05208840, NCT05242133, NCT05265728, NCT05340985, NCT05385744, NCT05532163, NCT06334094.

**Supplementary table 1. Comparison of phase III and phase IV clinical trials.**

| **Characteristics** | **Phase III** (n = 145) | **Phase IV** (n = 137) | **p-value** |
| --- | --- | --- | --- |
| **Drug type**, n (%)  Disease modifying therapy  Relapse treatment  Symptomatic drug  Other | 112 (77.2)  3 (2.1)  29 (20.0)  1 (0.7) | 101 (73.7)  8 (5.8)  17 (12.4)  11 (8.0) | 0.003 |
| **Add-on therapy**, n (%)  Yes  No | 13 (9.0)  132 (91.0) | 14 (10.2)  123 (89.8) | NS |
| **Study aim**, n (%)  Efficacy  Safety  Satisfaction  Other | 108 (74.5)  33 (22.8)  1 (0.7)  3 (2.1) | 89 (65.0)  20 (14.6)  8 (5.8)  20 (14.6) | < 0.001 |
| **Study arms**, n (%)  1  2  3  ≥ 4 | 35 (24.1)  81 (55.9)  24 (16.6)  5 (3.4) | 60 (43.8)  68 (49.6)  6 (4.4)  3 (2.2) | < 0.001 |
| **Assignment**, n (%)  Single group  Parallel  Crossover | 35 (24.1)  100 (69.0)  10 (6.9) | 60 (43.8)  70 (51.1)  7 (5.1) | 0.002 |
| **Randomization**, n (%)  Yes  No | 105 (72.4)  40 (27.6) | 58 (42.3)  79 (57.7) | < 0.001 |
| **Comparator group**, n (%)  Active agent  Other than active agent  None | 37 (25.5)  73 (50.3)  35 (24.1) | 22 (16.1)  55 (40.1)  60 (43.8) | 0.002 |
| **Masking**, n (%)  Open label  Single blind  Double blind  Triple blind  Quadruple blind | 48 (33.1)  7 (4.8)  20 (13.8)  25 (17.2)  45 (31.0) | 95 (69.3)  4 (2.9)  14 (10.2)  7 (5.1)  17 (12.4) | < 0.001 |
| **Age group**, n (%)  < 18 years  ≥ 18 years  Both | 6 (4.1)  135 (93.1)  4 (2.8) | 0 (0.0)  135 (98.5)  2 (1.5) | 0.040 |
| **Sex**, n (%)  Males  Females  Both | 1 (0.7)  0 (0.0)  144 (99.3) | 0 (0.0)  1 (0.7)  136 (99.3) | NS |
| **Maximum allowed disability**, n (%)  Mild (EDSS <4.0)  Moderate (EDSS 4.0 – 5.5)  Severe (EDSS >5.5) | 1 (0.7)  61 (42.1)  83 (57.2) | 3 (2.2)  35 (25.5)  99 (72.3) | 0.013 |
| **Disease phenotype**, n (%)  Relapsing forms 1  Non-relapsing forms 2  Relapsing and non-relapsing forms  Radiologically isolated syndrome | 97 (66.9)  8 (5.5)  39 (26.9)  1 (0.7) | 96 (70.1)  1 (0.7)  38 (27.7)  2 (1.5) | NS |
| **Number of participating centres**, n (%)  1  2 - 9  10 - 49  ≥ 50 | 18 (13.2)  12 (8.8)  45 (33.1)  61 (44.9) | 56 (44.1)  27 (21.3)  27 (21.3)  17 (13.4) | < 0.001 |
| **International study**, n (%)  Yes  No | 91 (65.5)  48 (34.5) | 23 (18.0)  105 (82.0) | < 0.001 |
| **Originally estimated sample size**, n (%)  < 100  ≥ 100 | 20 (13.8)  125 (86.2) | 73 (53.3)  64 (46.7) | < 0.001 |
| **Number of primary outcomes**, n (%)  One  Several | 109 (75.2)  36 (24.8) | 92 (67.2)  45 (32.8) | NS |
| **Type of primary outcome** 3, n (%)  Clinical  Paraclinical  Mixed or both | 106 (73.1)  23 (15.9)  16 (11.0) | 73 (53.3)  51 (37.2)  13 (9.5) | < 0.001 |
| **Patient-reported primary outcome**, n (%)  Yes  No | 20 (13.8)  125 (86.2) | 30 (21.9)  107 (78.1) | NS |
| **Composite primary outcome**, n (%)  Yes  No | 16 (11.0)  129 (89.0) | 15 (10.9)  122 (89.1) | NS |
| **Trial start date**, n (%)  2008 - 2015  2016 - 2024 | 91 (62.8)  54 (37.2) | 91 (66.4)  46 (33.6) | NS |
| **Estimated trial duration**, n (%)  < 2 years  ≥ 2 years | 41 (31.1)  91 (68.9) | 77 (62.1)  47 (37.9) | < 0.001 |
| **Sponsors and collaborators** 3, n (%)  University  Hospital  Industry  Government / public institution  Other | 11 (7.6)  17 (11.7)  127 (87.6)  2 (1.4)  3 (2.1) | 27 (19.7)  42 (30.7)  102 (74.5)  3 (2.2)  4 (2.9) | 0.003  < 0.001  0.005  NS  NS |
| **Principal investigator location**, n (%)  USA or Canada  Europe 4  Other | 34 (43.6)  30 (38.5)  14 (17.9) | 48 (39.7)  56 (46.3)  17 (14.0) | NS |
| **ClinicalTrials.govregistration**, n (%)  Prospective  Retrospective | 91 (62.8)  54 (37.2) | 74 (54.0)  63 (46.0) | NS |

EDSS: Expanded Disability Status Scale. NS: not significant.

1 Clinically isolated syndrome (CIS) and/or relapsing-remitting multiple sclerosis (RR-MS) and/or clinically active secondary progressive multiple sclerosis (SP-MS).

2 Clinically inactive secondary progressive multiple sclerosis (SP-MS) and/or primary progressive multiple sclerosis (PP-MS).

3 Several options can apply for the same trial.

4 Schengen area countries, UK and Ireland.

**Supplementary table 2. Reasons for trial ending based on the study phase** (note that several reasons can apply to the same trial). NS: not significant.

|  | **Trial phase** | | | **Phase III subtype** | | | **Phase IV subtype** | | |
| --- | --- | --- | --- | --- | --- | --- | --- | --- | --- |
| **Phase III**  (normally ended = 114; failed = 31) | **Phase IV**  (normally ended = 97; failed = 40) | **p-value** | **Efficacy studies**  (normally ended = 82; failed = 26) | **Other studies**  (normally ended = 32; failed = 5) | **p-value** | **Extension studies**  (normally ended = 10; failed = 0) | **Other studies**  (normally ended = 87; failed = 40) | **p-value** |
| **Normally ended trials,** n (%)  Trial completion  Efficacy reasons  Safety reasons  Other | 107 (93.9)  4 (3.5)  0 (0.0)  3 (2.6) | 96 (99.0)  1 (1.0)  0 (0.0)  0 (0.0) | NS  NS  -  NS | 77 (93.9)  4 (4.9)  0 (0.0)  1 (1.2) | 30 (93.8)  0 (0.0)  0 (0.0)  2 (6.2) | NS  NS  -  NS | 10 (100.0)  0 (0.0)  0 (0.0)  0 (0.0) | 86 (98.9)  1 (1.1)  0 (0.0)  0 (0.0) | NS  NS  -  - |
| **Failed trials**, n (%)  Low recruitment  High number of dropouts  Inadequate trial design  Logistical problems  Ethical concerns  Unspecified business decision  Other  Reason not provided | 7 (22.6)  0 (0.00)  5 (16.1)  2 (6.5)  0 (0.00)  10 (32.3)  0 (0.00)  9 (29.0) | 13 (32.5)  0 (0.00)  0 (0.00)  7 (17.5)  1 (2.5)  9 (22.5)  1 (2.5)  11 (27.5) | NS  -  0.013  NS  NS  NS  NS  NS | 5 (19.2)  0 (0.00)  4 (15.4)  2 (7.7)  0 (0.00)  8 (30.8)  0 (0.00)  9 (34.6) | 2 (40.0)  0 (0.00)  1 (20.0)  0 (0.00)  0 (0.00)  2 (40.0)  0 (0.00)  0 (0.00) | NS  -  NS  NS  -  NS  -  NS | -  -  -  -  -  -  -  - | 13 (32.5)  0 (0.0)  0 (0.0)  7 (17.5)  1 (2.5)  9 (22.5)  1 (2.5)  11 (27.5) | -  -  -  -  -  -  -  - |

**Supplementary table 3. Reasons for trial ending based on the experimental drug** (note that several reasons for failure can apply to the same trial). DMT: disease-modifying therapy. NS: not significant.

|  | **Drug type** | | | | | **Add-on therapy** | | |
| --- | --- | --- | --- | --- | --- | --- | --- | --- |
| **DMT**  (normally ended = 160; failed = 53) | **Relapse treatment** (normally ended = 6; failed = 5) | **Symptomatic drug**  (normally ended = 38; failed = 8) | **Other**  (normally ended = 7; failed = 5) | **p-value** | **Yes** (normally ended = 18; failed = 9) | **No** (normally ended = 193; failed = 62) | **p-value** |
| **Normally ended trials,** n (%)  Trial completion  Efficacy reasons  Safety reasons  Other | 153 (95.6)  4 (2.5)  0 (0.0)  3 (1.9) | 6 (100.0)  0 (0.0)  0 (0.0)  0 (0.0) | 38 (100.0)  0 (0.0)  0 (0.0)  0 (0.0) | 6 (85.7)  1 (14.3)  0 (0.0)  0 (0.0) | NS  NS  -  NS | 18 (100.0)  0 (0.0)  0 (0.0)  0 (0.0) | 185 (95.9)  5 (2.6)  0 (0.0)  3 (1.6) | NS  NS  -  NS |
| **Failed trials**, n (%)  Low recruitment  High number of dropouts  Inadequate trial design  Logistical problems  Ethical concerns  Unspecified business decision  Other  Reason not provided | 13 (24.5)  0 (0.0)  5 (21.7)  5 (21.7)  0 (0.0)  17 (32.1)  1 (1.9)  14 (26.4) | 4 (80.0)  0 (0.0)  0 (0.0)  3 (60.0)  0 (0.0)  0 (0.0)  0 (0.0)  0 (0.0) | 2 (25.0)  0 (0.0)  0 (0.0)  0 (0.0)  0 (0.0)  2 (25.0)  0 (0.0)  4 (50.0) | 1 (20.0)  0 (0.0)  0 (0.0)  1 (20.0)  1 (20.0)  0 (0.0)  0 (0.0)  2 (40.0) | NS  -  NS  0.019  NS  NS  NS  NS | 2 (22.2)  0 (0.0)  0 (0.0)  1 (11.1)  0 (0.0)  2 (22.2)  0 (0.0)  5 (55.5) | 18 (29.0)  0 (0.0)  5 (8.1)  8 (12.9)  1 (1.6)  17 (27.4)  1 (1.6)  15 (24.2) | NS  -  NS  NS  NS  NS  NS  NS |

**Supplementary table 4. Reasons for trial ending based on the study eligibility criteria** (note that several reasons for failure can apply to the same trial). EDSS: Expanded Disability Status Scale. NS: not significant. RIS: radiologically isolated syndrome. 1 Clinically isolated syndrome and/or relapsing-remitting multiple sclerosis and/or clinically active secondary progressive multiple sclerosis. 2 Clinically inactive secondary progressive multiple sclerosis and/or primary progressive multiple sclerosis.

|  | **Disease phenotype** | | | | | **Maximum allowed disability** | | | |
| --- | --- | --- | --- | --- | --- | --- | --- | --- | --- |
| **Relapsing forms** 1(normally ended = 140; failed = 53) | **Non relapsing-forms** 2(normally ended 8 =; failed = 1) | **Relapsing and non-relapsing forms**  (normally ended = 61 ; failed = 16) | **RIS**  (normally ended = 2; failed = 1) | **p-value** | **Mild**  (EDSS < 4.0) (normally ended = 4; failed = 0) | **Moderate** (EDSS 4.0 – 5.5)(normally ended = 73; failed = 23) | **Severe**  (EDSS > 5.5)(normally ended = 134; failed = 48) | **p-value** |
| **Normally ended trials,** n (%)  Trial completion  Efficacy reasons  Safety reasons  Other | 134 (95.7)  3 (2.1)  0 (0.0)  3 (2.1) | 7 (87.5)  1 (12.5)  0 (0.0)  0 (0.0) | 60 (98.4)  1 (1.6)  0 (0.0)  0 (0.0) | 2 (100.0)  0 (0.0)  0 (0.0)  0 (0.0) | NS  NS  -  NS | 4 (100.0)  0 (0.0)  0 (0.0)  0 (0.0) | 70 (95.9)  2 (2.7)  0 (0.0)  1 (1.4) | 129 (96.3)  3 (2.2)  0 (0.0)  2 (1.5) | NS  NS  -  NS |
| **Failed trials**, n (%)  Low recruitment  High number of dropouts  Inadequate trial design  Logistical problems  Ethical concerns  Unspecified business decision  Other  Reason not provided | 17 (32.1)  0 (0.0)  4 (7.5)  7 (13.2)  0 (0.0)  15 (28.3)  0 (0.0)  13 (24.5) | 0 (0.0)  0 (0.0)  0 (0.0)  0 (0.0)  0 (0.0)  1 (100.0)  0 (0.0)  0 (0.0) | 2 (12.5)  0 (0.0)  1 (6.2)  2 (12.5)  1 (6.2)  3 (18.7)  1 (6.2)  7 (43.7) | 1 (100.0)  0 (0.0)  0 (0.0)  0 (0.0)  0 (0.0)  0 (0.0)  0 (0.0)  0 (0.0) | NS  NS  NS  NS  NS  NS  NS  NS | -  -  -  -  -  -  -  - | 5 (21.7)  0 (0.0)  5 (21.7)  1 (4.3)  0 (0.0)  9 (39.1)  0 (0.0)  5 (21.7) | 15 (31.2)  0 (0.0)  0 (0.0)  8 (16.7)  1 (2.1)  10 (20.8)  1 (2.1)  15 (31.2) | NS  -  0.004  NS  NS  NS  NS  NS |

**Supplementary table 5. Reasons for trial ending based on the primary outcome** (note that several reasons for failure can apply to the same trial).

|  | **Primary outcome** | | | | | | |
| --- | --- | --- | --- | --- | --- | --- | --- |
| **Clinical**  (normally ended = 139; failed = 40) | **Paraclinical**  (normally ended = 49; failed = 25) | **Both**  (normally ended = 23; failed = 6) | **p-value** | **Individual measure** (normally ended = 189; failed = 62) | **Composite endpoint** (normally ended = 22; failed = 9) | **p-value** |
| **Normally ended trials,** n (%)  Trial completion  Efficacy reasons  Safety reasons  Other | 132 (95.0)  5 (3.6)  0 (0.0)  2 (1.4) | 48 (98.0)  0 (0.0)  0 (0.0)  1 (2.0) | 23 (100.0)  0 (0.0)  0 (0.0)  0 (0.0) | NS  NS  -  NS | 183 (96.8)  3 (1.6)  0 (0.0)  3 (1.6) | 20 (90.9)  2 (9.1)  0 (0.0)  0 (0.0) | NS  NS  -  NS |
| **Failed trials**, n (%)  Low recruitment  High number of dropouts  Inadequate trial design  Logistical problems  Ethical concerns  Unspecified business decision  Other  Reason not provided | 14 (35.0)  0 (0.0)  5 (12.5)  5 (12.5)  1 (2.5)  9 (22.5)  1 (2.5)  9 (22.5) | 3 (12.0)  0 (0.0)  0 (0.0)  4 (16.0)  0 (0.0)  9 (36.0)  0 (0.0)  9 (36.0) | 3 (50.0)  0 (0.0)  0 (0.0)  0 (0.0)  0 (0.0)  1 (16.7)  0 (0.0)  2 (33.3) | 0.042  -  NS  NS  NS  NS  NS  NS | 16 (25.8)  0 (0.0)  5 (8.1)  9 (14.5)  1 (1.6)  16 (25.8)  0 (0.0)  19 (30.6) | 4 (44.4)  0 (0.0)  0 (0.0)  0 (0.0)  0 (0.0)  3 (33.3)  1 (11.1)  1 (11.1) | NS  -  NS  NS  NS  NS  NS  NS |

**Supplementary table 6. Factors associated with clinical trial failure.** 95% CI: 95% confidence interval. NS: not significant. OR: odds ratio.

| **Characteristics** | **Multivariate analysis*** | | |
| --- | --- | --- | --- |
| OR | 95% CI | p-value |
| **Study phase**  III  IV | 1  0.97 | -  0.46 – 2.03 | -  NS |
| **Study aim**  Efficacy  Safety  Satisfaction  Other | 1  0.32  0.55  0.48 | -  0.12 – 0.85  0.05 – 5.59  0.14 – 1.63 | -  0.023  NS  NS |
| **Number of participating centres**  1  2 - 9  10 - 49  ≥ 50 | 1  0.83  0.36  0.08 | -  0.34 – 2.04  0.13 – 0.99  0.02 – 0.35 | -  NS  0.048  < 0.001 |
| **International study**  No  Yes | 1  1.36 | -  0.48 – 3.88 | -  NS |
| **Trial start date** (year)  2008 - 2015  2016 – 2024 | 1  1.78 | -  0.92 – 3.46 | -  NS |
| **Industry sponsorship or collaboration**  Yes  No | 1  1.97 | -  0.83 – 4.68 | -  NS |
| **ClinicalTrials.govregistration**  Retrospective  Prospective | 1  1.93 | -  0.94 – 3.94 | -  NS |

* Adjusted by the variables “*study phase*”, “*study aim*”, “*number of participating centres*”, “*international study*”, “*trial start date*”, “*industry sponsorship or collaboration*” and “*ClinicalTrial.gov registration*”.

**Supplementary table 7. Factors associated with clinical trial failure.** 95% CI: 95% confidence interval. NS: not significant. OR: odds ratio.

| **Characteristics** | **Multivariate analysis*** | | |
| --- | --- | --- | --- |
| OR | 95% CI | p-value |
| **Study phase**  III  IV (extension studies)  IV (other studies) | 1  0.00  1.17 | -  0.0 – >100.0  0.54 – 2.54 | -  NS  NS |
| **Study aim**  Efficacy  Safety  Satisfaction  Other | 1  0.34  0.49  0.49 | -  0.12 – 0.91  0.05 – 4.96  0.14 – 1.69 | -  0.032  NS  NS |
| **Number of participating centres**  1  2 - 9  10 - 49  ≥ 50 | 1  0.83  0.38  0.09 | -  0.33 – 2.05  0.14 – 1.07  0.02 – 0.37 | -  NS  NS  < 0.001 |
| **International study**  No  Yes | 1  1.58 | -  0.54 – 4.63 | -  NS |
| **Trial start date** (year)  2008 - 2015  2016 – 2024 | 1  1.84 | -  0.94 – 3.60 | -  NS |
| **Industry sponsorship or collaboration**  Yes  No | 1  1.96 | -  0.82 – 4.69 | -  NS |
| **ClinicalTrials.govregistration**  Retrospective  Prospective | 1  1.96 | -  0.95 – 4.02 | -  NS |

* Adjusted by the variables “*study phase*”, “*study aim*”, “*number of participating centres*”, “*international study*”, “*trial start date*”, “*industry sponsorship or collaboration*” and “*ClinicalTrial.gov registration*”.
